# Supplementary material
Source: PubMed Central journal article supplement (PMC3138276)
Supplement: supp_M110.217414_jbc.M110.217414-1.pdf [file supp_M110.217414_jbc.M110.217414-1.pdf]

# Supplementary Figure S1

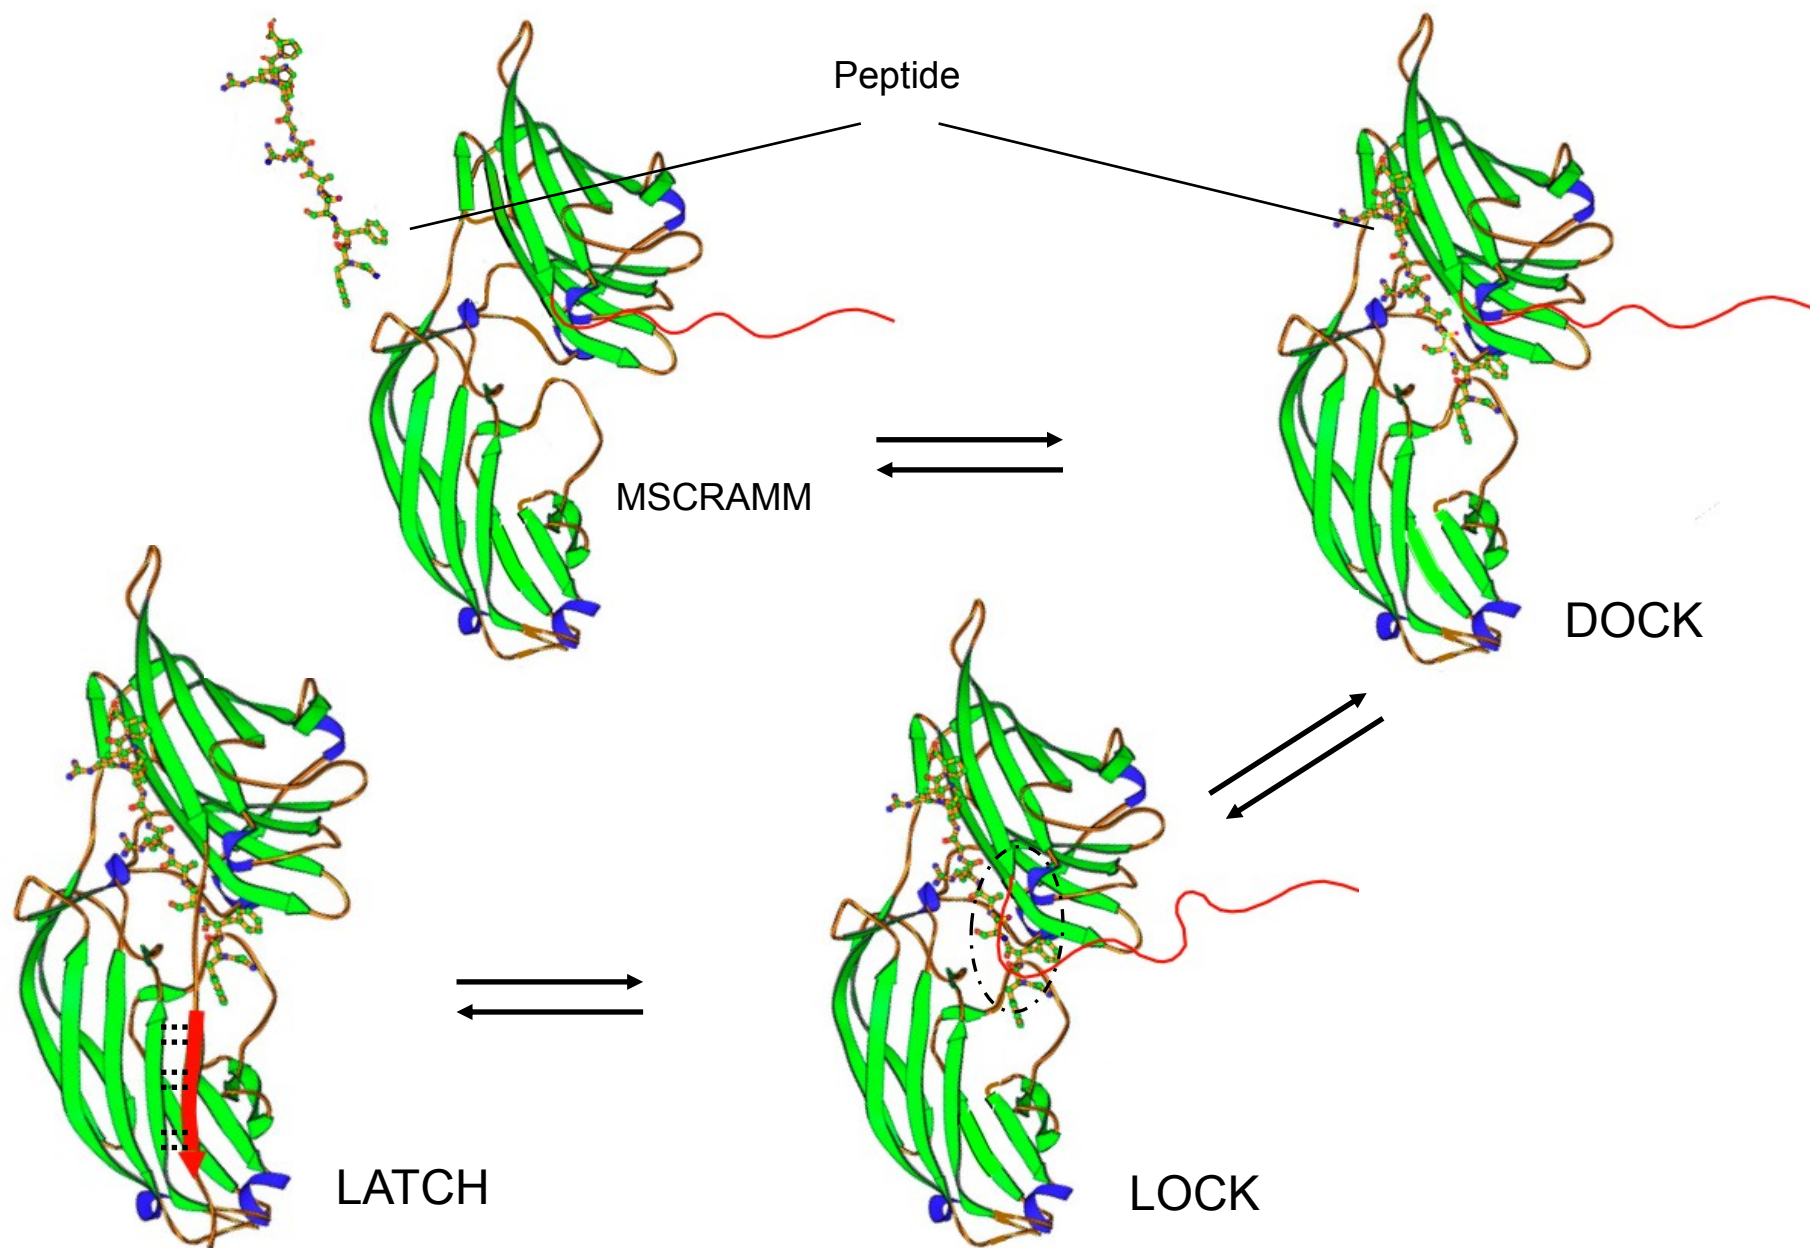

**Supplemental Figure S1.** Representation of the Dock, Lock and Latch (DLL) mechanism. The crystal structures of apo-protein SdrG and a complex of SdrG-Fg peptide were used to generate the molecular mechanism of binding.
